# Supplementary material for: An atlas of chaperone–protein interactions in Saccharomyces cerevisiae: implications to protein folding pathways in the cell
Source: PubMed Central journal article supplement — Mol Syst Biol. 2009 Jun 16;5:275. doi: 10.1038/msb.2009.26 (PMC2710862; doi:10.1038/msb.2009.26), 2009-06-16
Supplement: msb200926-s2.pdf [file msb200926-s2.pdf]

**A**

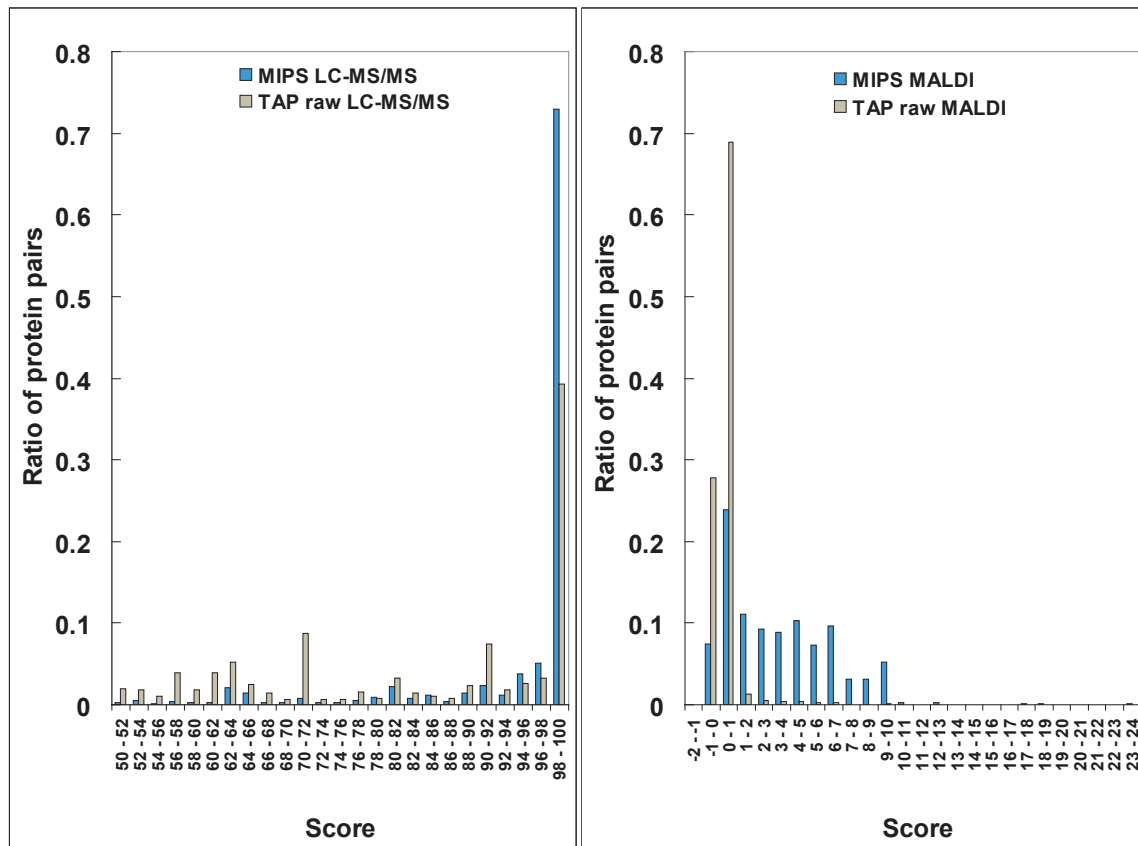

**B**

| Chaperone   | Fold enrichment of known interactors |
|-------------|--------------------------------------|
| Jid1_Hsp40  | 144.67                               |
| Jjj2_Hsp40  | 78.91                                |
| Gim4_PFD    | 42.55                                |
| Xdj1_Hsp40  | 36.17                                |
| Hsp26_SMALL | 35.21                                |
| Mdj1_Hsp40  | 24.80                                |
| Ssc3_Hsp70  | 19.42                                |
| Hsp12_SMALL | 19.38                                |
| Hsp60_Hsp60 | 15.72                                |
| Zuo1_Hsp40  | 15.01                                |
| Ssc2_Hsp70  | 14.91                                |
| Cwc23_Hsp40 | 14.47                                |
| Cct4_CCT    | 14.44                                |
| Hsp31_SMALL | 13.91                                |
| Kar2_Hsp70  | 13.91                                |
| Scj1_Hsp40  | 12.06                                |
| Tcp1_CCT    | 11.79                                |
| Yke2_PFD    | 8.05                                 |
| Djp1_Hsp40  | 7.95                                 |
| Ssc1_Hsp70  | 7.42                                 |
| Ssa3_Hsp70  | 6.85                                 |
| Gim3_PFD    | 6.55                                 |
| Pac10_PFD   | 6.24                                 |
| Hsc82_Hsp90 | 6.14                                 |
| Hsp42_SMALL | 6.12                                 |
| Hsp104_AAA  | 6.08                                 |
| Swa2_Hsp40  | 6.00                                 |
| Sec63_Hsp40 | 5.67                                 |
| Ssz1_Hsp70  | 3.28                                 |
| Cct8_CCT    | 3.11                                 |
| Ssb2_Hsp70  | 2.59                                 |
| Hsp82_Hsp90 | 1.43                                 |
| Ssa1_Hsp70  | 1.37                                 |
| Ssb1_Hsp70  | 1.26                                 |
