# Supplementary material for: An atlas of chaperone–protein interactions in Saccharomyces cerevisiae: implications to protein folding pathways in the cell
Source: PubMed Central journal article supplement — Mol Syst Biol. 2009 Jun 16;5:275. doi: 10.1038/msb.2009.26 (PMC2710862; doi:10.1038/msb.2009.26), 2009-06-16

**A**

| Enriched SCOP protein class                     | Number of interacting chaperones |   |   |   |   |    |    |       |       |     |
|-------------------------------------------------|----------------------------------|---|---|---|---|----|----|-------|-------|-----|
|                                                 | 1                                | 2 | 7 | 8 | 9 | 10 | 11 | 12-13 | 14-16 | 17+ |
| Membrane and cell surface proteins and peptides | ■                                | ■ |   |   |   |    |    |       |       |     |
| All beta proteins                               |                                  |   | ■ | ■ |   |    | ■  |       | ■     |     |
| Alpha and beta proteins (a+b)                   |                                  |   |   | ■ |   |    |    | ■     |       | ■   |
| Small proteins                                  |                                  |   |   |   | ■ |    |    | ■     |       |     |
| Alpha and beta proteins (a/b)                   |                                  |   |   |   |   |    |    |       | ■     |     |
| Multi-domain proteins (alpha and beta)          |                                  |   |   |   | ■ |    |    |       |       | ■   |
| All alpha proteins                              |                                  |   |   |   | ■ | ■  |    | ■     | ■     | ■   |

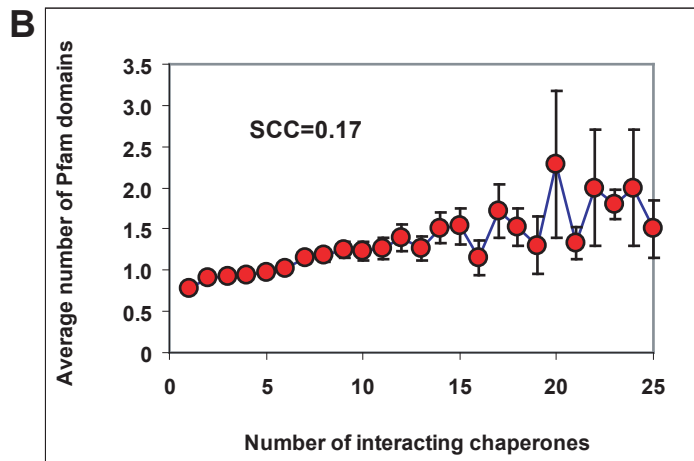

Supplement: msb200926-s5.pdf [file msb200926-s5.pdf]
