# Supplementary material for: An atlas of chaperone–protein interactions in Saccharomyces cerevisiae: implications to protein folding pathways in the cell
Source: PubMed Central journal article supplement — Mol Syst Biol. 2009 Jun 16;5:275. doi: 10.1038/msb.2009.26 (PMC2710862; doi:10.1038/msb.2009.26), 2009-06-16
Supplement: msb200926-s6.pdf [file msb200926-s6.pdf]

**A**

| Enriched GO slim cellular component | Number of interacting chaperones |   |   |   |   |   |   |   |   |    |       |       |     |  |
|-------------------------------------|----------------------------------|---|---|---|---|---|---|---|---|----|-------|-------|-----|--|
|                                     | 1                                | 2 | 3 | 4 | 5 | 6 | 7 | 8 | 9 | 10 | 12-13 | 14-16 | 17+ |  |
| membrane                            | 1                                |   |   |   |   |   |   |   |   |    |       |       |     |  |
| membrane fraction                   | 1                                |   |   |   |   |   |   |   |   |    |       |       |     |  |
| endoplasmic reticulum               | 1                                | 1 |   |   |   |   |   |   |   |    |       |       |     |  |
| plasma membrane                     | 1                                | 1 |   |   |   |   |   |   |   |    |       |       |     |  |
| vacuole                             |                                  |   | 1 |   |   |   |   |   |   |    |       |       |     |  |
| cytoplasmic membrane-bound vesicle  |                                  |   | 1 |   |   |   |   |   |   |    |       |       |     |  |
| cellular bud                        |                                  |   | 1 |   |   |   |   |   |   |    |       |       |     |  |
| site of polarized growth            |                                  |   | 1 |   |   |   |   |   |   |    |       |       |     |  |
| cytoplasm                           |                                  |   |   | 1 | 1 | 1 | 1 | 1 |   |    |       |       |     |  |
| cytoskeleton                        |                                  |   |   | 1 | 1 | 1 | 1 | 1 |   |    |       |       |     |  |
| cell wall                           |                                  |   |   | 1 | 1 | 1 | 1 | 1 |   |    |       |       |     |  |
| cell cortex                         |                                  |   |   | 1 | 1 | 1 | 1 | 1 |   |    |       |       |     |  |
| microtubule organizing center       |                                  |   |   | 1 | 1 | 1 | 1 | 1 |   |    |       |       |     |  |
| Golgi apparatus                     |                                  |   |   | 1 | 1 | 1 | 1 | 1 |   |    |       |       |     |  |
| chromosome                          |                                  |   |   |   |   |   |   |   | 1 | 1  | 1     | 1     | 1   |  |
| nucleus                             |                                  |   |   |   |   |   |   |   | 1 | 1  | 1     | 1     | 1   |  |
| nucleolus                           |                                  |   |   |   |   |   |   |   | 1 | 1  | 1     | 1     | 1   |  |

**B**

| Enriched GO slim molecular function | Number of interacting chaperones |   |   |   |   |   |    |    |       |       |     |   |   |  |
|-------------------------------------|----------------------------------|---|---|---|---|---|----|----|-------|-------|-----|---|---|--|
|                                     | 1                                | 2 | 3 | 4 | 8 | 9 | 10 | 11 | 12-13 | 14-16 | 17+ |   |   |  |
| transporter activity                | 1                                | 1 |   |   |   |   |    |    |       |       |     |   |   |  |
| hydrolase activity                  | 1                                | 1 |   |   |   |   |    |    |       |       |     |   |   |  |
| nucleotidyltransferase activity     |                                  |   |   | 1 |   |   |    |    | 1     | 1     | 1   | 1 | 1 |  |
| peptidase activity                  |                                  |   |   | 1 |   |   |    |    |       |       |     |   | 1 |  |
| protein kinase activity             |                                  |   |   | 1 |   |   |    |    | 1     | 1     | 1   | 1 | 1 |  |
| helicase activity                   |                                  |   |   | 1 |   |   |    |    | 1     | 1     | 1   | 1 | 1 |  |
| ligase activity                     |                                  |   |   | 1 |   |   |    |    | 1     | 1     | 1   | 1 | 1 |  |
| phosphoprotein phosphatase activity |                                  |   |   | 1 |   |   |    |    | 1     | 1     | 1   | 1 | 1 |  |
| protein binding                     |                                  |   |   | 1 |   |   |    |    | 1     | 1     | 1   | 1 | 1 |  |
| enzyme regulator activity           |                                  |   |   | 1 |   |   |    |    | 1     | 1     | 1   | 1 | 1 |  |
| DNA binding                         |                                  |   |   | 1 |   |   |    |    | 1     | 1     | 1   | 1 | 1 |  |
| RNA binding                         |                                  |   |   | 1 |   |   |    |    | 1     | 1     | 1   | 1 | 1 |  |
| lyase activity                      |                                  |   |   | 1 |   |   |    |    | 1     | 1     | 1   | 1 | 1 |  |
| translation regulator activity      |                                  |   |   | 1 |   |   |    |    | 1     | 1     | 1   | 1 | 1 |  |

**C**

| Enriched GO slim biological process            | Number of interacting chaperones |   |   |   |   |   |   |   |   |    |    |       |       |     |
|------------------------------------------------|----------------------------------|---|---|---|---|---|---|---|---|----|----|-------|-------|-----|
|                                                | 1                                | 2 | 3 | 4 | 5 | 6 | 7 | 8 | 9 | 10 | 11 | 12-13 | 14-16 | 17+ |
| cellular respiration                           | 1                                |   |   |   |   |   |   |   |   |    |    |       |       |     |
| electron transport                             | 1                                |   |   |   |   |   |   |   |   |    |    |       |       |     |
| vitamin metabolic process                      | 1                                |   |   |   |   |   |   |   |   |    |    |       |       |     |
| cellular homeostasis                           | 1                                |   |   |   |   |   |   |   |   |    |    |       |       |     |
| transport                                      | 1                                | 1 |   |   |   |   |   |   |   |    |    |       |       |     |
| organelle organization and biogenesis          | 1                                | 1 |   |   |   |   |   |   |   |    |    |       |       |     |
| conjugation                                    | 1                                |   |   |   |   |   | 1 |   |   |    |    |       |       |     |
| generation of precursor metabolites and energy | 1                                | 1 |   |   |   |   |   |   |   |    |    |       |       |     |
| lipid metabolic process                        | 1                                |   | 1 |   |   |   |   |   |   |    |    |       |       |     |
| cytoskeleton organization and biogenesis       | 1                                |   | 1 |   |   |   |   |   |   |    |    |       |       |     |
| RNA metabolic process                          | 1                                |   | 1 |   |   |   |   |   |   |    |    |       |       |     |
| carbohydrate metabolic process                 | 1                                |   | 1 |   |   |   |   |   |   |    |    |       |       |     |
| vesicle-mediated transport                     | 1                                |   | 1 |   |   |   |   |   | 1 |    |    |       |       |     |
| pseudohyphal growth                            | 1                                |   | 1 |   |   |   |   |   | 1 |    |    |       |       |     |
| ribosome biogenesis and assembly               | 1                                |   | 1 |   |   |   |   | 1 | 1 | 1  | 1  | 1     | 1     | 1   |
| transcription                                  | 1                                |   | 1 |   |   |   |   |   | 1 | 1  | 1  | 1     | 1     | 1   |
| protein catabolic process                      | 1                                |   | 1 |   |   |   |   |   | 1 | 1  | 1  | 1     | 1     | 1   |
| nuclear organization and biogenesis            | 1                                |   | 1 |   |   |   |   |   | 1 | 1  | 1  | 1     | 1     | 1   |
| cell budding                                   | 1                                |   | 1 |   |   |   |   |   | 1 | 1  | 1  | 1     | 1     | 1   |
| membrane organization and biogenesis           | 1                                |   | 1 |   |   |   |   |   | 1 | 1  | 1  | 1     | 1     | 1   |
| DNA metabolic process                          | 1                                |   | 1 |   |   |   |   |   | 1 | 1  | 1  | 1     | 1     | 1   |
