# Supplementary figures and images for: An atlas of chaperone–protein interactions in Saccharomyces cerevisiae: implications to protein folding pathways in the cell
Source: PubMed Central journal article supplement — Mol Syst Biol. 2009 Jun 16;5:275. doi: 10.1038/msb.2009.26 (PMC2710862; doi:10.1038/msb.2009.26), 2009-06-16

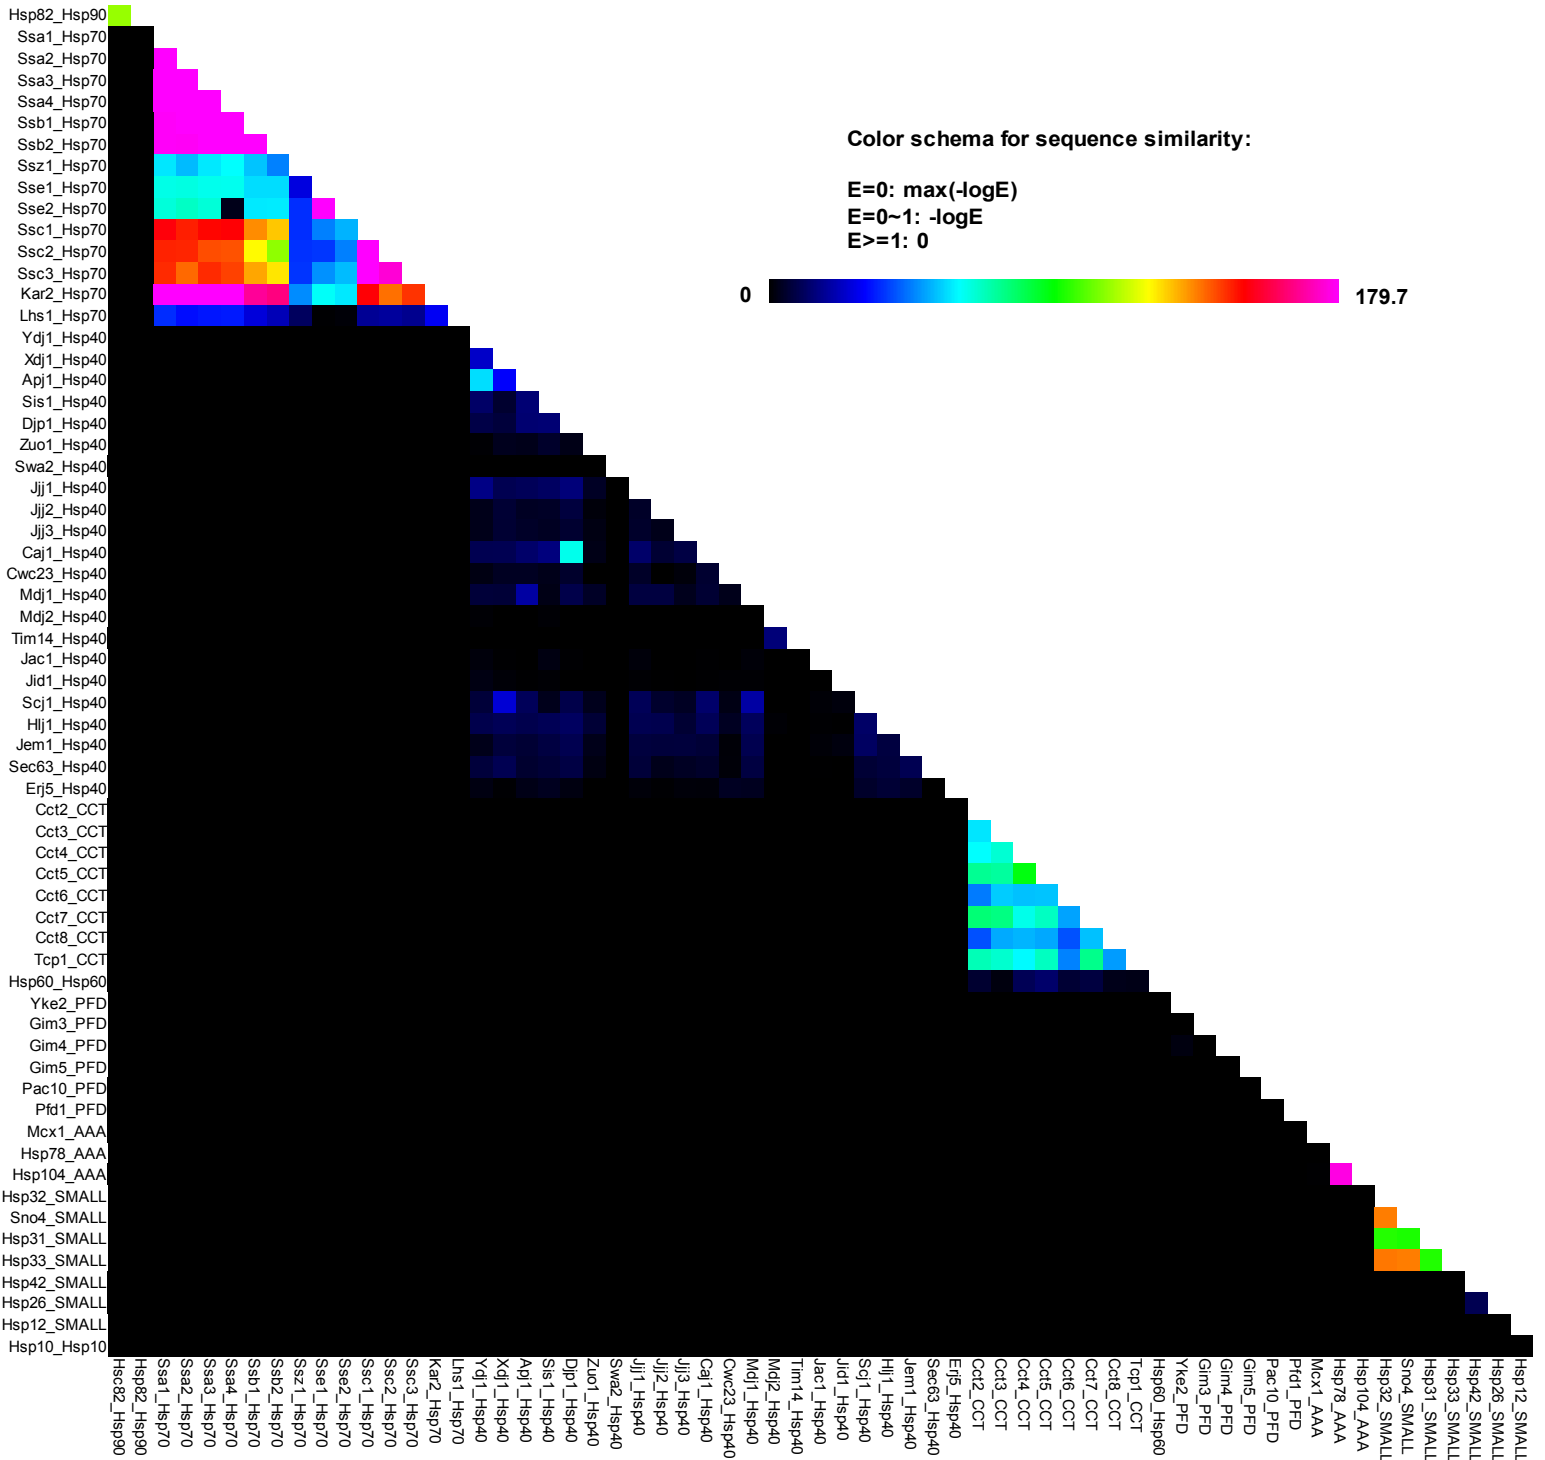

Supplement: msb200926-s1.pdf [file msb200926-s1.pdf]

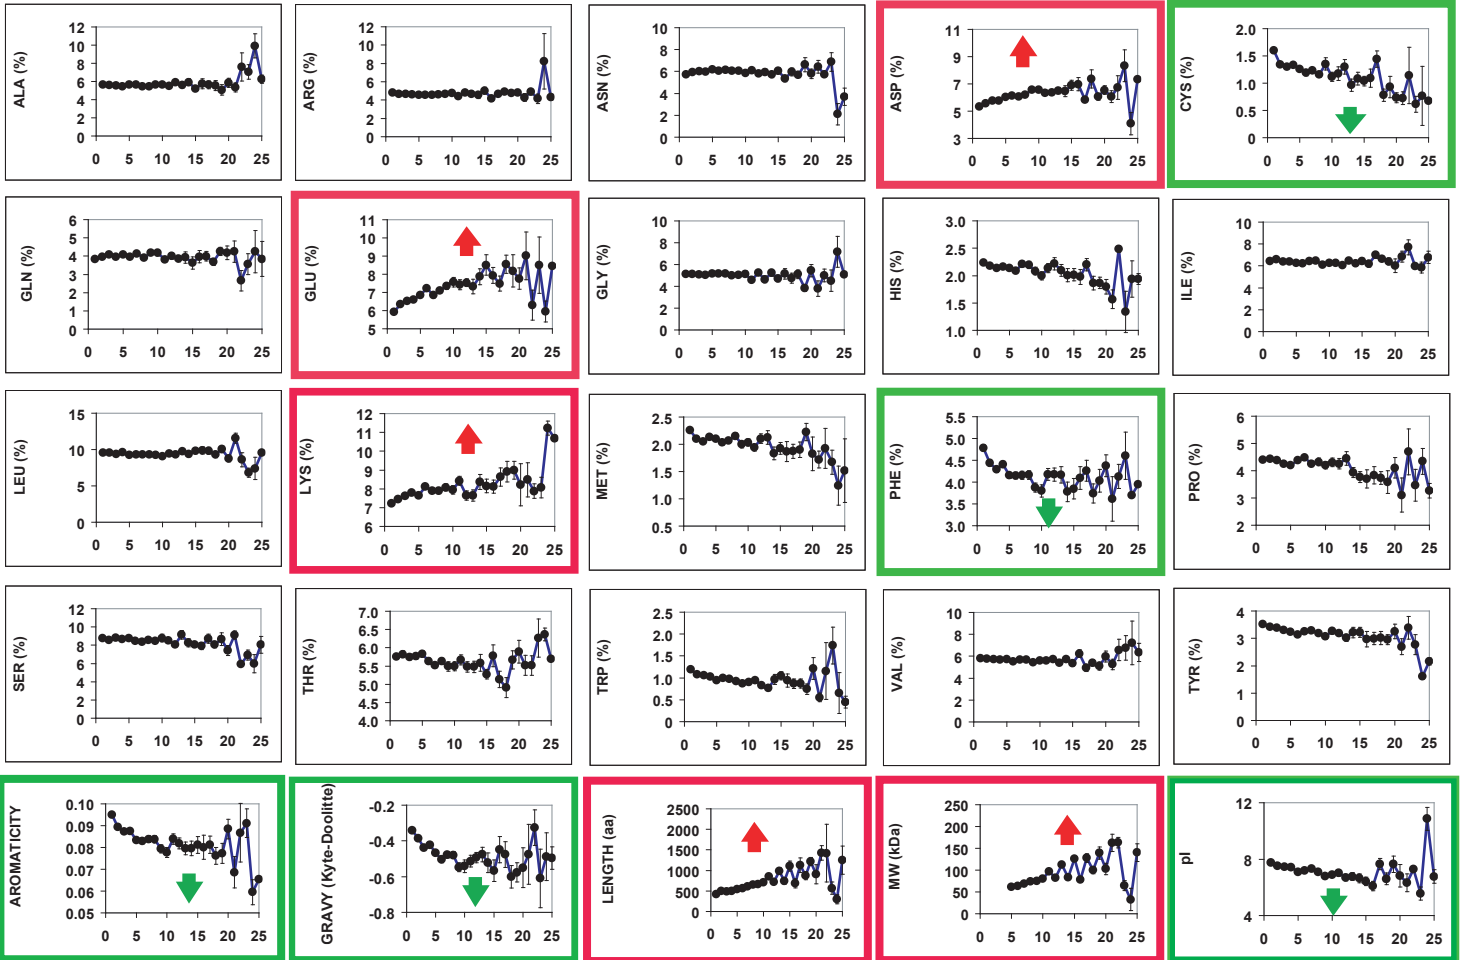

Supplement: msb200926-s3.pdf [file msb200926-s3.pdf]
